# Supplementary material for: Stigmasterol-Based Novel Low Molecular Weight/Mass Organic Gelators
Source: Molecules. 2011 Nov 8;16(11):9357–67. doi: 10.3390/molecules16119357 (PMC6264699; doi:10.3390/molecules16119357)

**3a** (water / acetonitrile 0 to 100 %)

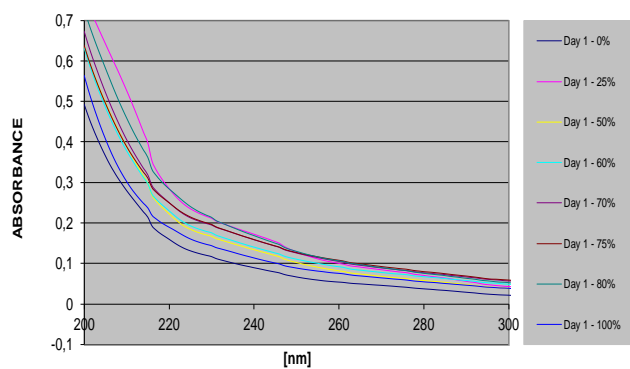

**3b** (water / acetonitrile 0 to 100 %)

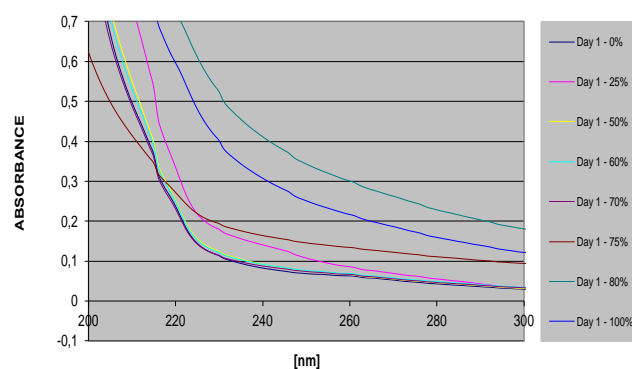

**3a** (water / acetonitrile 0 to 100 %)

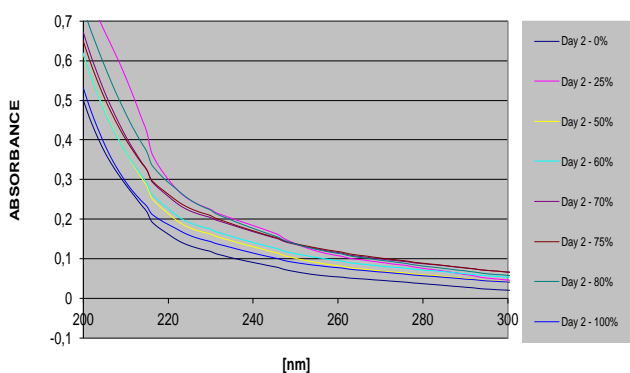

**3b** (water / acetonitrile 0 to 100 %)

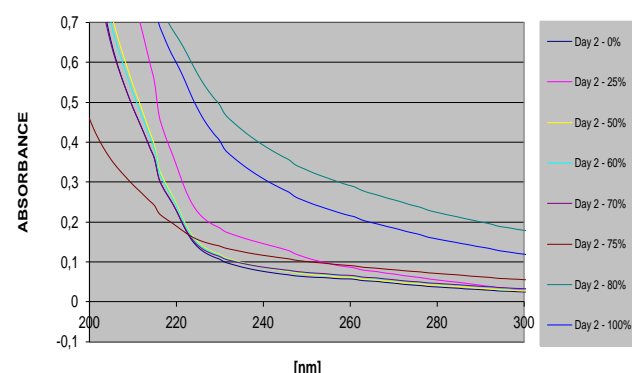

**3a** (water / acetonitrile 0 to 100 %)

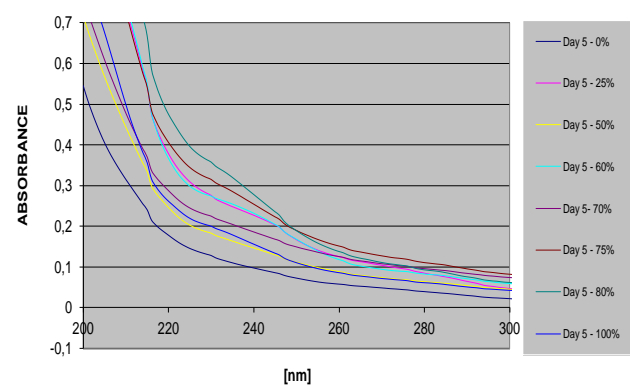

**3b** (water / acetonitrile 0 to 100 %)

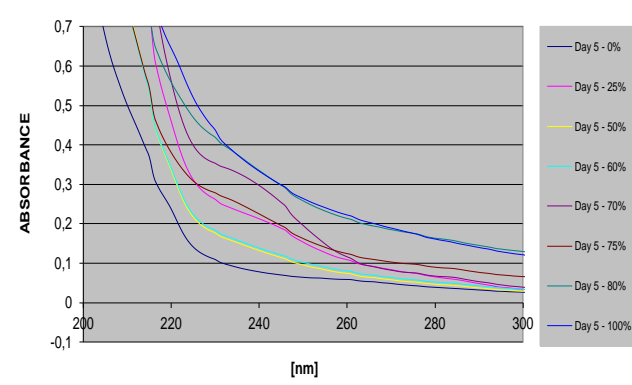

**3a** (water / acetonitrile 0 to 100 %)

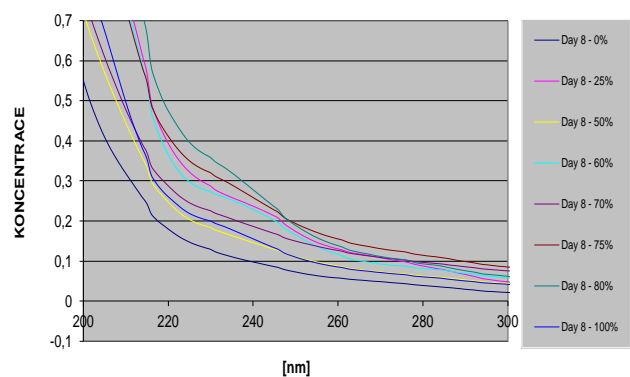

**3b** (water / acetonitrile 0 to 100 %)

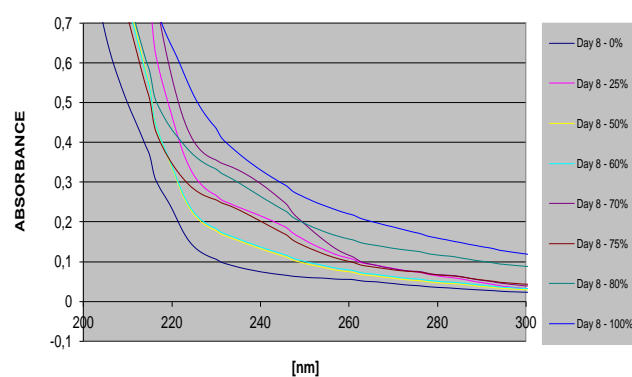

Supplement: Supplementary File 1 [file molecules-16-09357-s001.pdf]
